# Supplementary material
Source: PubMed Central journal article supplement (PMC9427669)

# Supplementary Figure 1

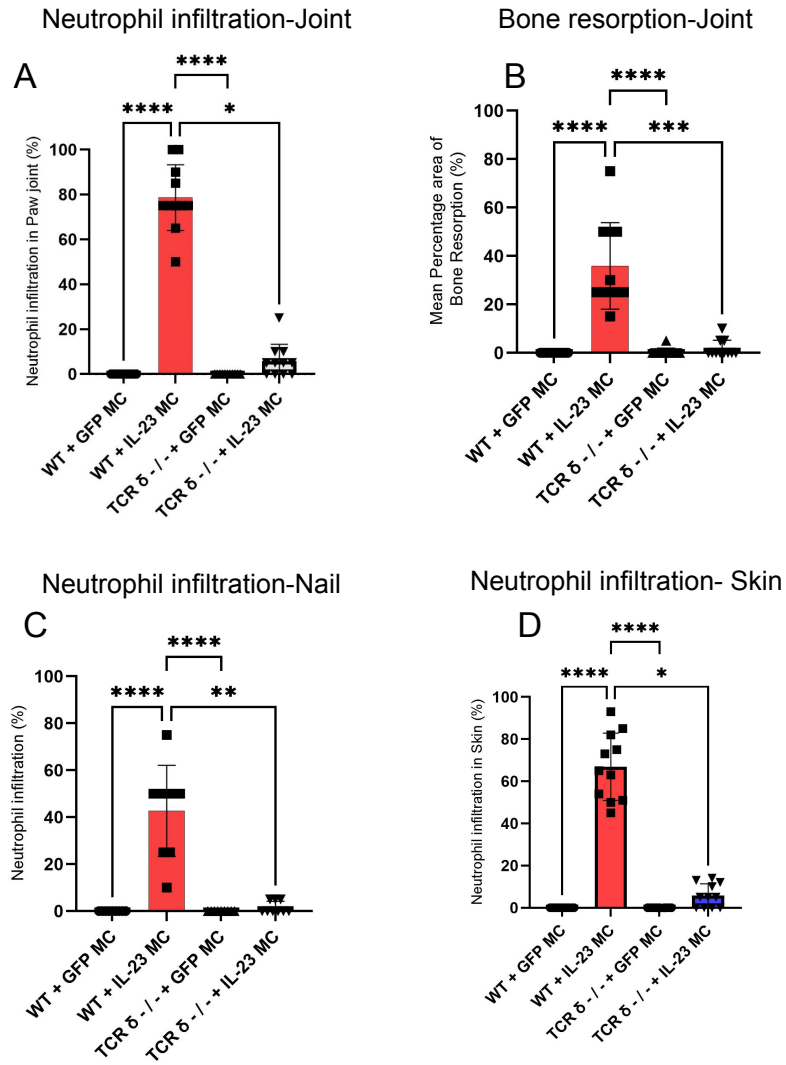

Supplementary Figure 2

## IL-23 MC VS GFP MC

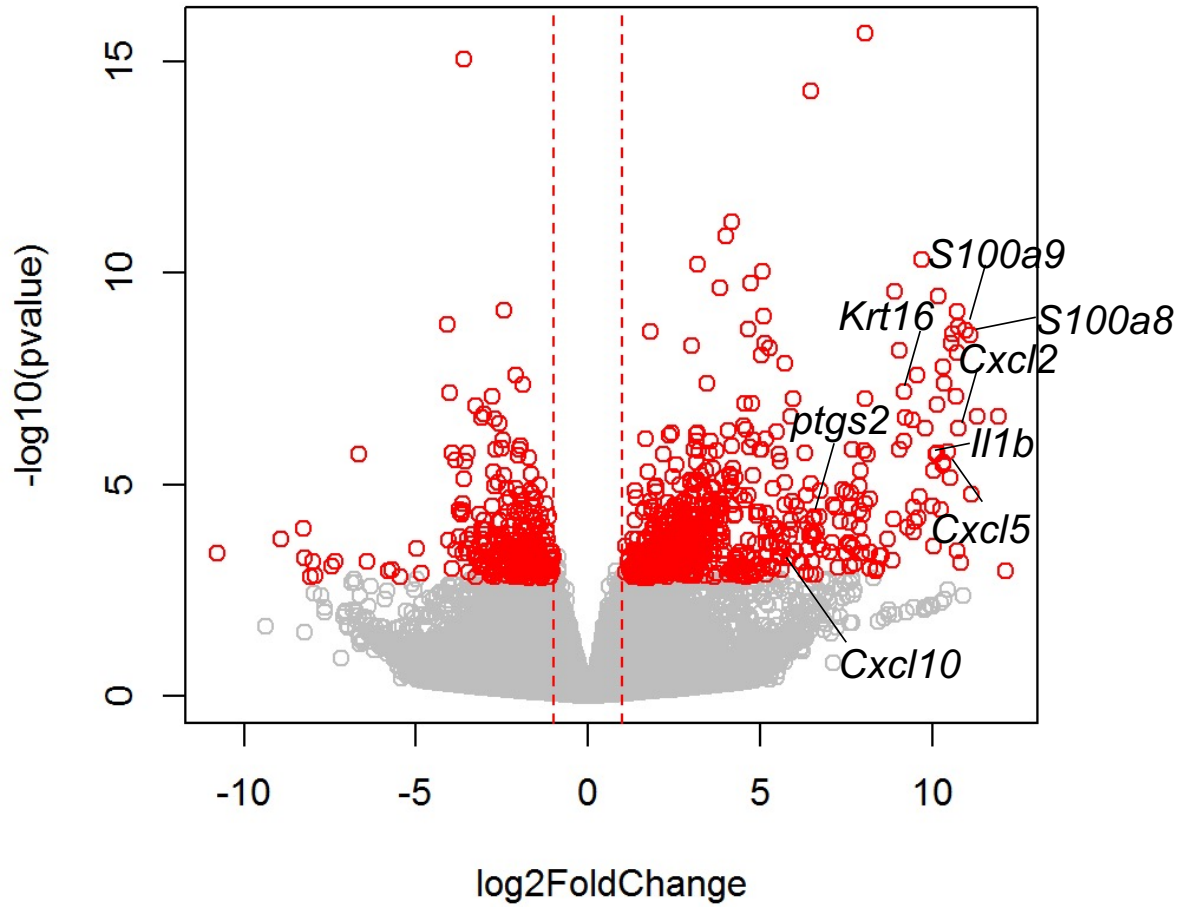

# Supplementary Figure 3

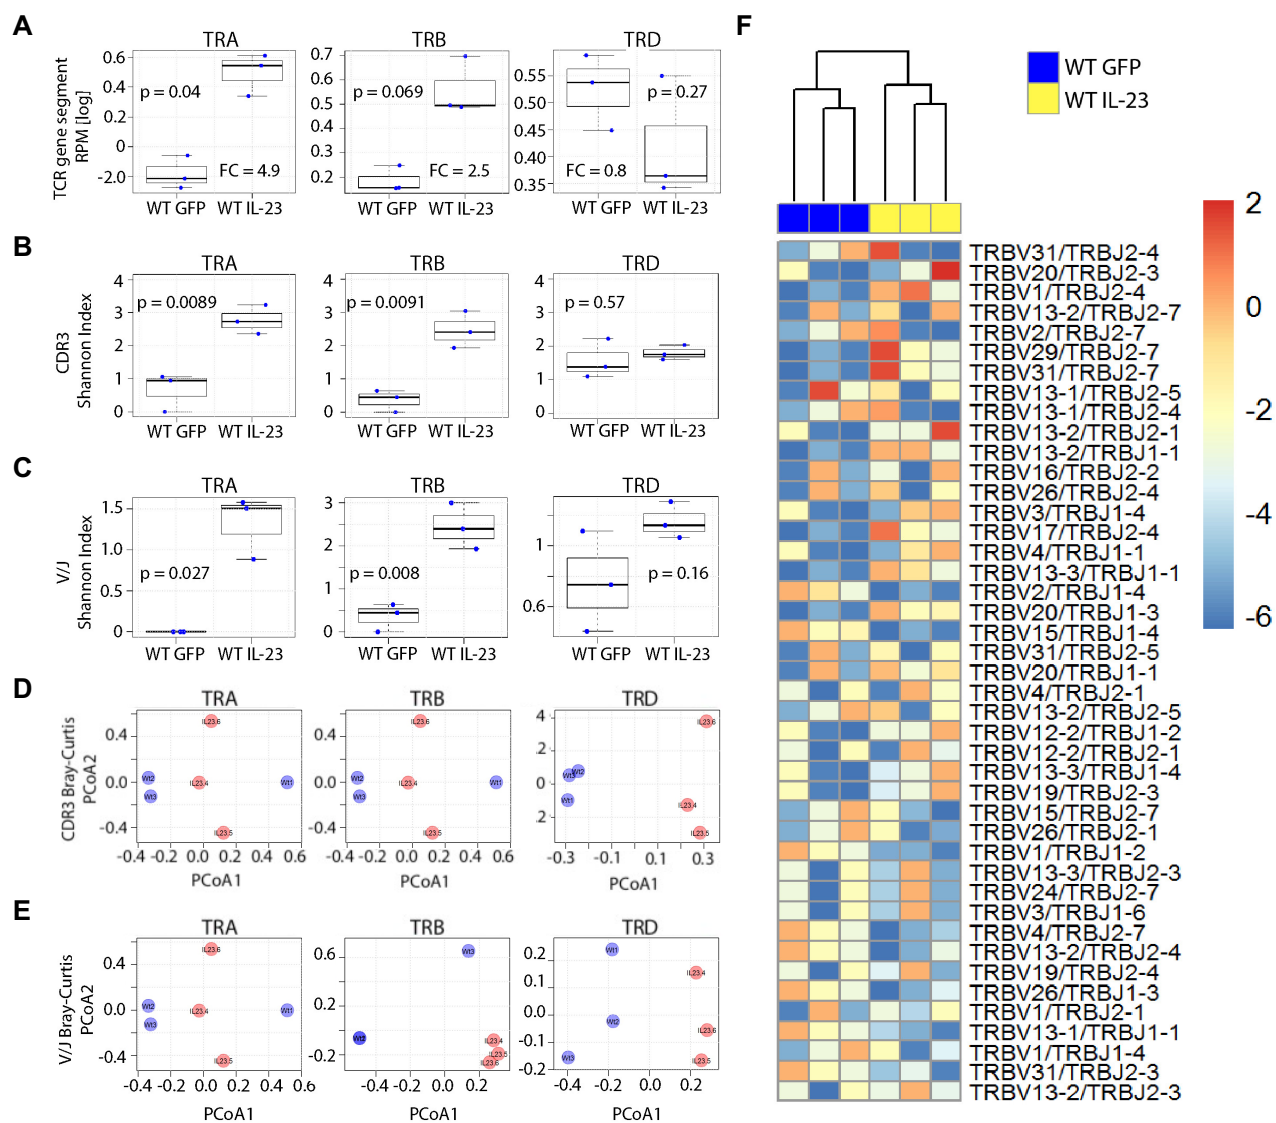

# Supplementary Figure 4

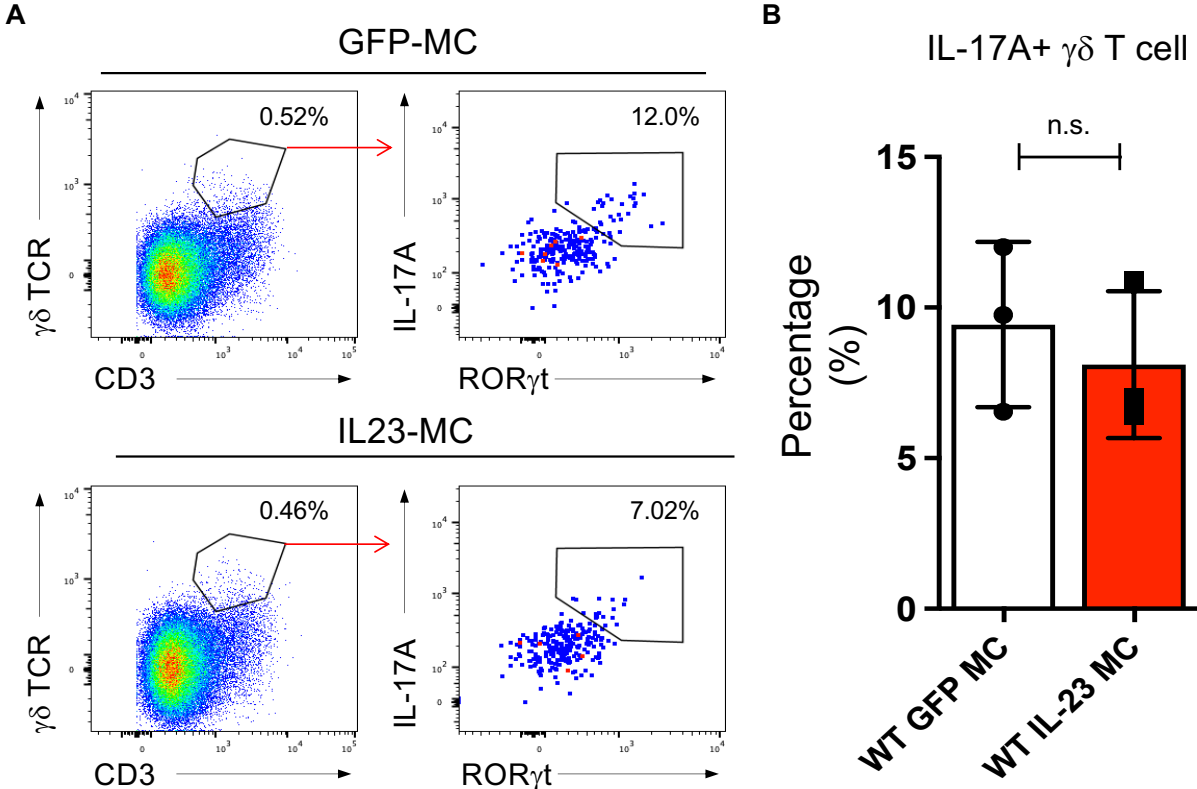

# Supplementary Figure 5

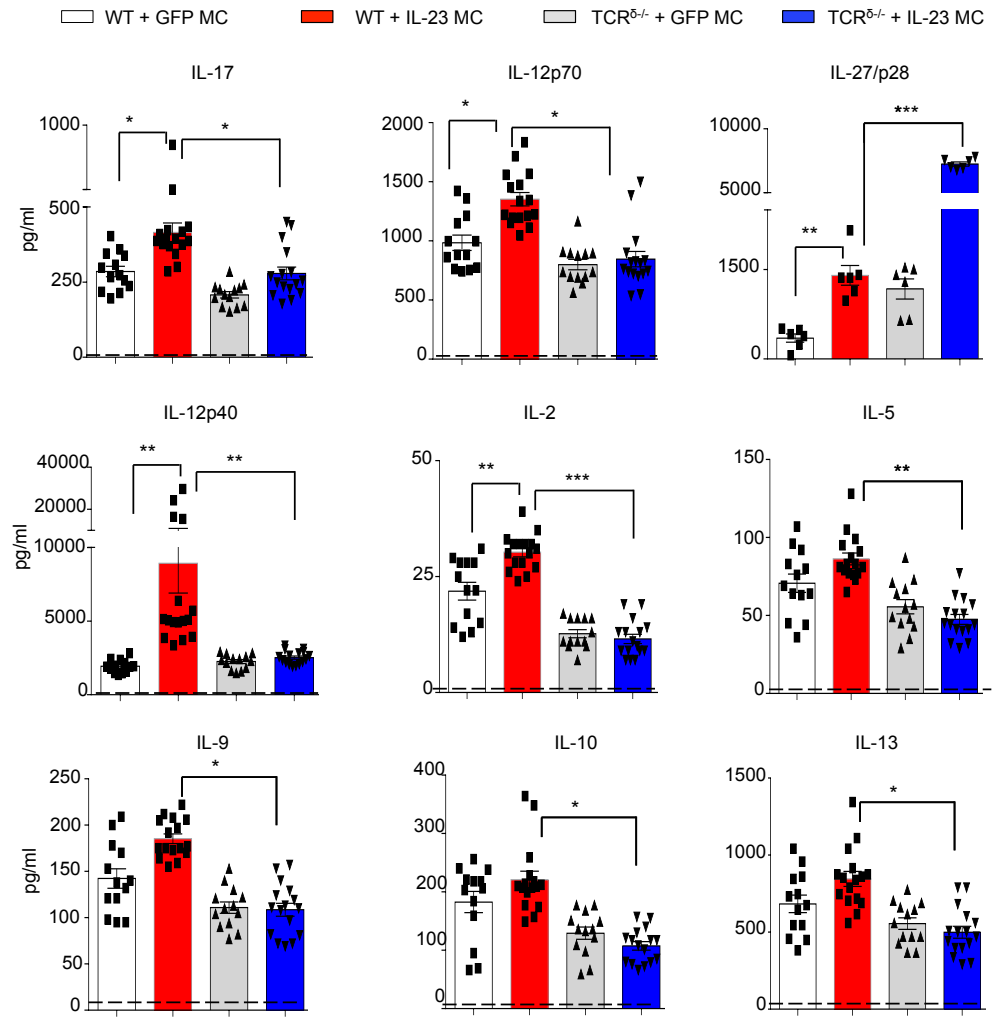

# Supplementary Figure 6

**A**

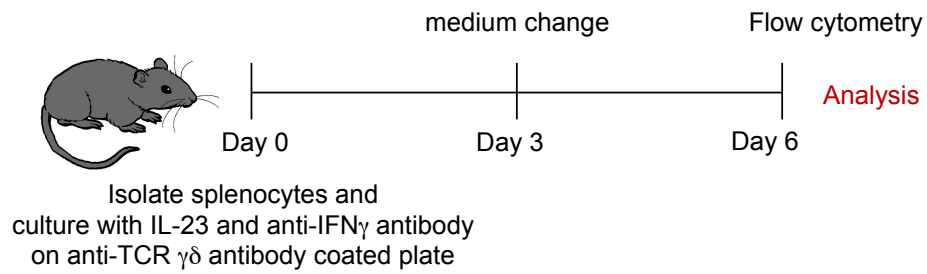

**B**

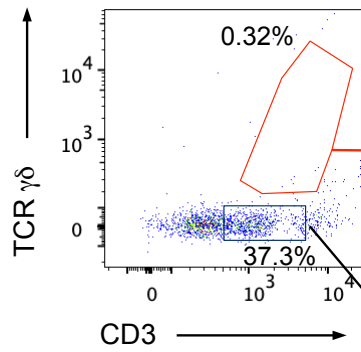

**C**

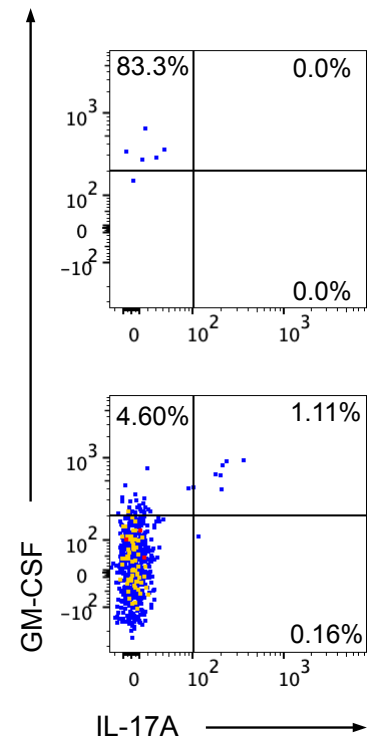

**D**

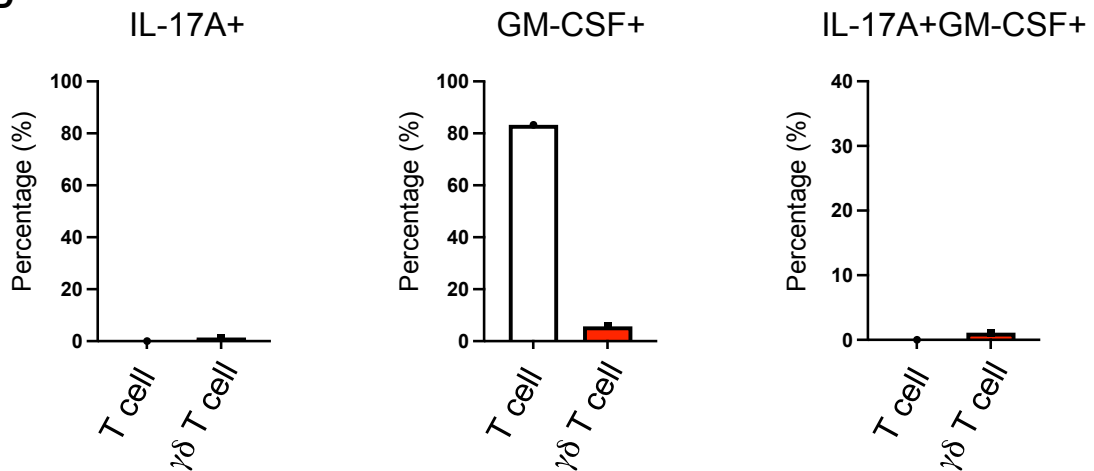

Supplement: NIHMS1790960-supplement-supinfo2.pdf [file NIHMS1790960-supplement-supinfo2.pdf]
